# Supplementary material for: Divergent northern and southern populations and demographic history of the pearl oyster in the western Pacific revealed with genomic SNPs
Source: PubMed Central journal article supplement (PMC7086055; doi:10.1111/eva.12905), 2020-01-08
Supplement: EVA-13-837-s001.pdf [file EVA-13-837-s001.pdf]

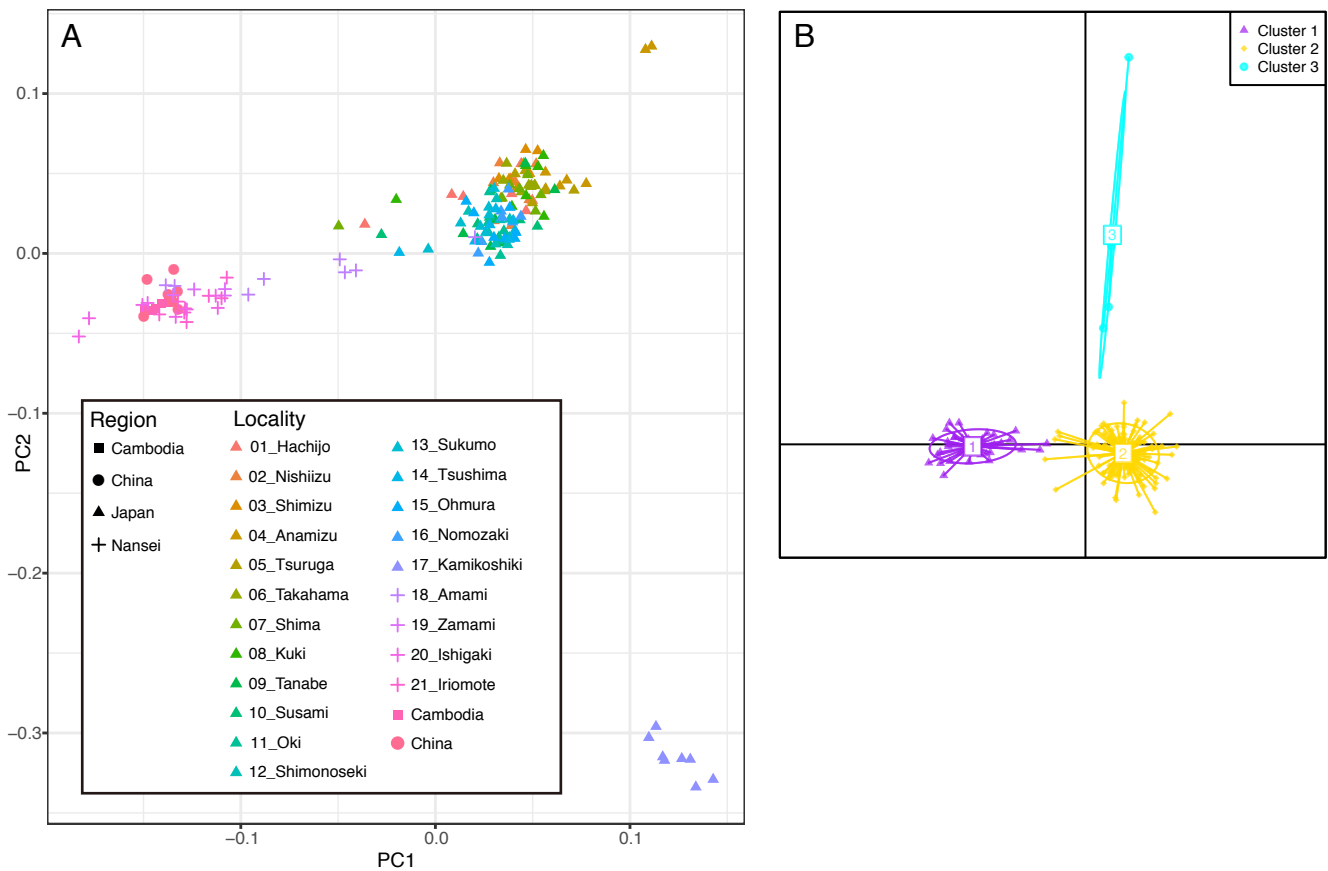

**Supplementary Figure 1. Southern and northern populations of *P. fucata* in the western Pacific identified by PCA and DAPC.** A) PCA of the western Pacific samples. B) DAPC of the western Pacific samples. Cluster 1 and 2 represent northern and southern populations, respectively. Cluster 3 includes individuals from Kamikoshiki Island (JPN\_17).

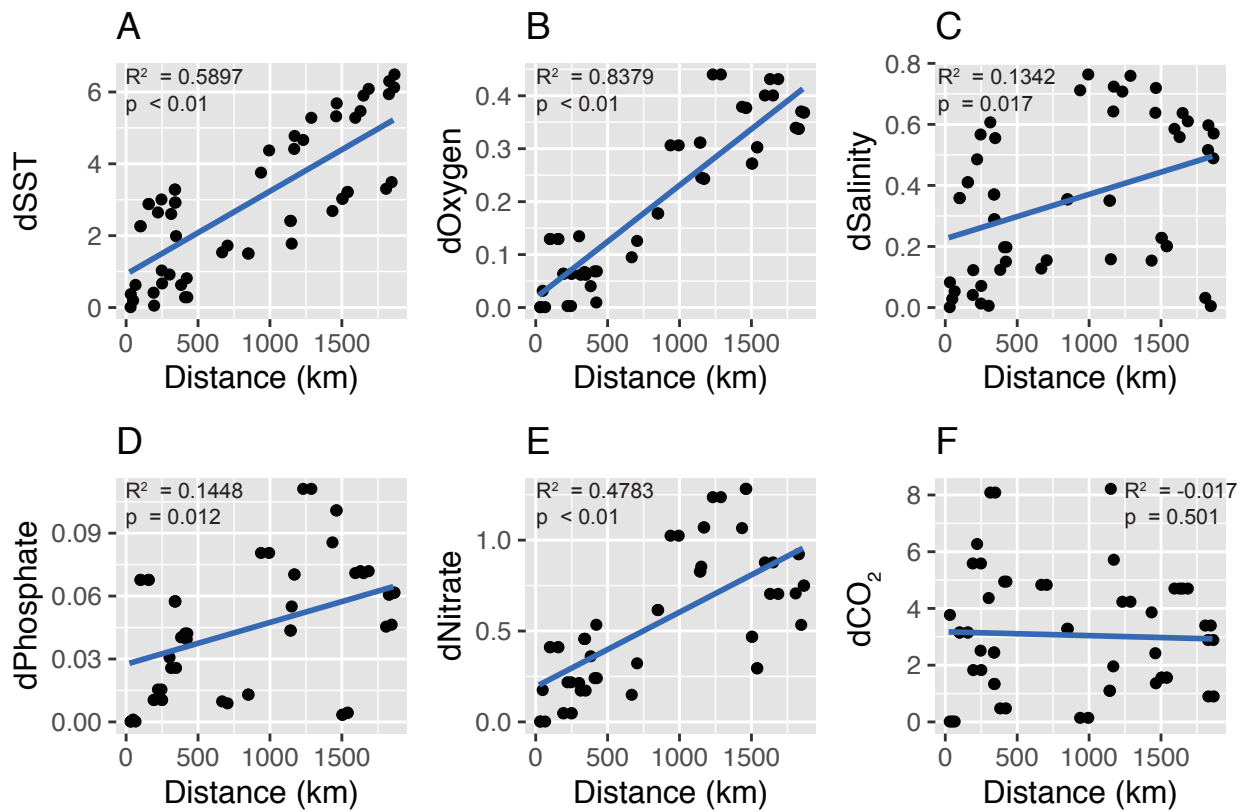

**Supplementary Figure 2. Correlation between distance and difference in environmental factors among localities along the Kuroshio Current.** Regression lines are shown in blue. Adjusted R-squared and p-values for Mantel tests are also indicated.

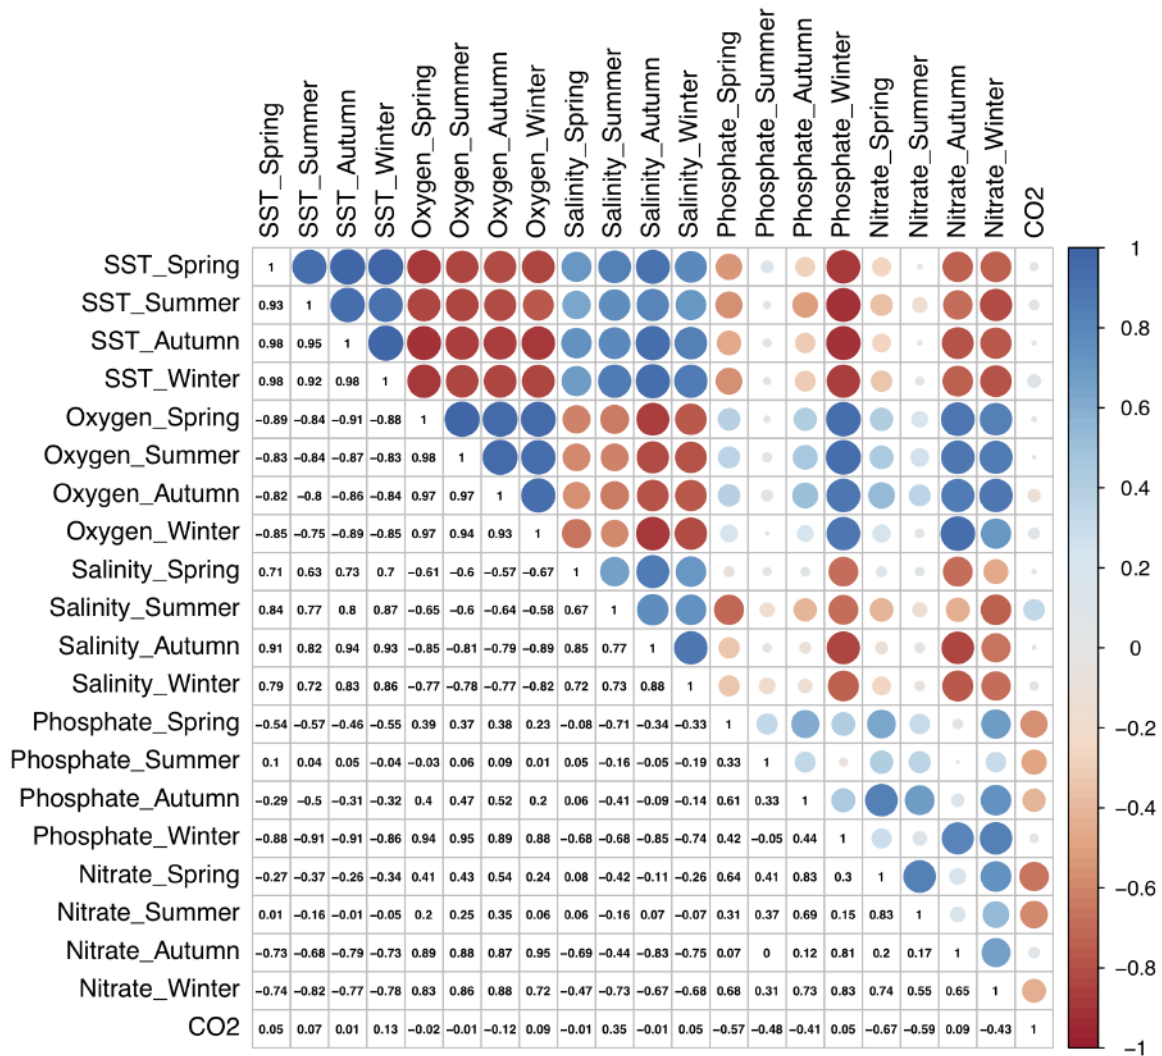

**Supplementary Figure 3. Pairwise correlation among environmental factors.** Pearson's correlation coefficients are shown in the lower left. Colored circles in the upper right visualize the correlation coefficients.

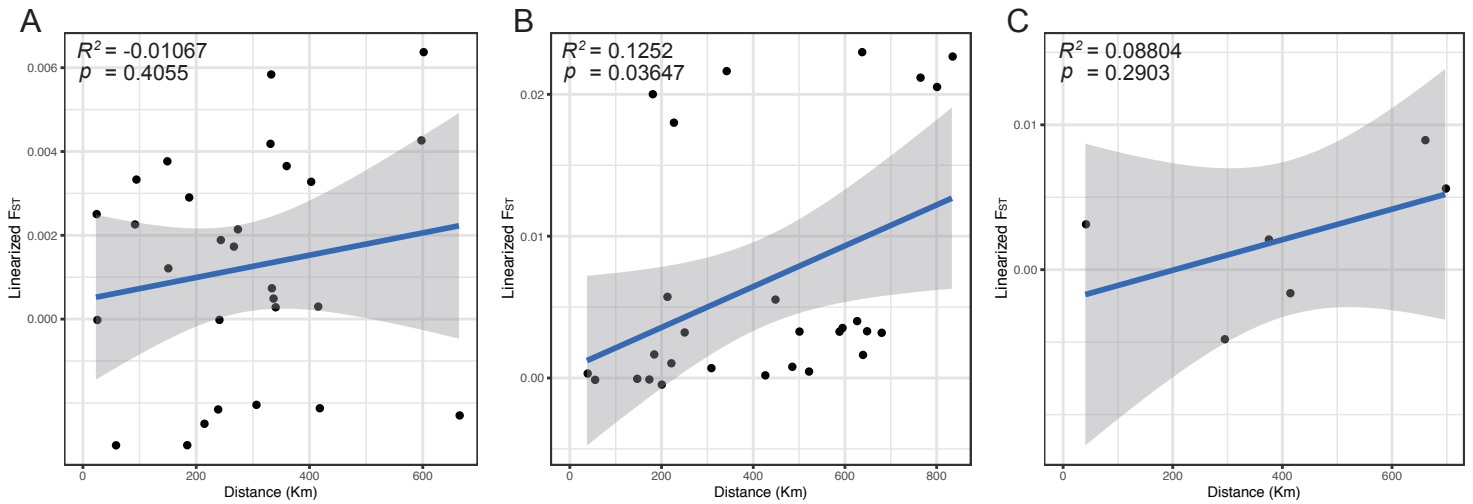

**Supplementary Figure 4. Assessment of Isolation-by-distance (IBD).** A) Pacific Japan, B) Japan Sea, and C) Nansei regions. IBD is less evident in these regions. Dots indicate pairwise comparisons. Regression lines are shown in blue and 95% confidence limits are shown in gray. P-values are calculated using simple Mantel test.
